1           **INTEGRATED NCDs TREATMENT AND CARE AMONG PEOPLE LIVING WITH**  
2           **HIV/AIDS ATTENDING CARE AND TREATMENT AT A HEALTH FACILITY**

3

4   Atuganile Musyani<sup>1 2</sup>, Grace Mosi<sup>1 2</sup>, Erik Kinyenje<sup>1 2</sup>, Albertino Damasceno<sup>5</sup>, Mucho  
5   Mizinduko<sup>2</sup>, Rogath Kishimba<sup>1 3</sup>, Meshack Shimwela<sup>4</sup>, Leonard Subi<sup>3</sup>.

6

7                   <sup>4</sup> Temeke Regional Referral Hospital

8                   <sup>3</sup> Ministry of Health Community Development Gender Elderly and Children

9                   <sup>1</sup> Tanzania Field Epidemiology and Laboratory Training Programme

10                  <sup>2</sup> Muhimbili University of Health and Allied Sciences

11                  <sup>5</sup>Eduardo Mondlane University-Maputo, Mozambique

12

13   **ABSTRACT**

14   **Introduction:**

15   Persons living with HIV (PLHIV) in Tanzania now live longer due to the advancement of HIV  
16   care programs. For this reason, they are at an increased risk of developing Non-Communicable  
17   Diseases (NCDs). Despite many resources committed to HIV care programs, NCDs care is not  
18   effectively integrated into these programs. The study aimed at describing missed opportunities to  
19   diagnose and manage hypertension and diabetes and implementing and evaluating the effect of  
20   three months of preventive efforts among among PLHIV attending care and treatment centers  
21   (CTC)

22

23 **Materials and methods:**

24 We evaluated 333 PLHIV attending CTC for blood pressure and blood sugar levels. Patients who  
25 were diagnosed with high blood pressure equal to or above 140/90 mm Hg, or on treatment for  
26 hypertension and a fasting blood sugar above 7.0 mmol/L (126 mg/dl) were subjected to a small  
27 intervention aimed at increasing health literacy on the adherence to and control of their  
28 pathologies. Re-evaluation of their blood pressure and blood sugar levels was done at the end of a  
29 3 months intervention.

30

31 **Results:**

32 Of the evaluated 333 PLHIV, 71 (21.32%) had hypertension and 9 (2.70%) had high blood sugar.  
33 Among 177 PLHIV who never had their BP measured before, 37/177 (20.90%) were diagnosed  
34 with hypertension. The cohort group involved analysis of 76 patients with either uncontrolled  
35 hypertension or diabetes followed for three months. By the end of the 3<sup>rd</sup> month of intervention,  
36 26/71 (36.6%) were able to control their blood pressure (BP < 140 SBP and < 90 DBP). The mean  
37 blood pressure decreased from 164/99.5 mmHg to 159 /96mmHg. Of the 9 PLHIV with high blood  
38 glucose levels, 5/9 (55.5%) had their blood sugar normalized at the end of the intervention. In a  
39 focused group discussion, most patients reported difficulties in controlling their BP due to the high  
40 cost of medication and consequently poor adherence to medication.

41

42 **Conclusion:**

43 The burden of undiagnosed NCDs among PLHIV attending care and treatment clinic is remarkably  
44 high. Interventions to address such diseases in CTC seem to work. HIV care and treatment  
45 programs should provide integrated care that includes NCDs care.

## 46 INTRODUCTION

47 Global Non-Communicable Diseases (NCDs) burden remains unacceptably high (1). In 2016,  
48 NCDs were responsible for 41 million of the world's 57 million deaths (71%), where 44% were  
49 due to cardiovascular diseases (CVD) and 4% were due to diabetes (2). CVD and diabetes caused  
50 31% and 3% respectively of all deaths globally (3). Deaths due to NCDs are expected to increase  
51 to 55 million by 2030 (4). In Tanzania in 2016, among 409,000 deaths, 134,970 (33%) were due  
52 to NCDs (5). Of these, (17,546) 13% and (2700) 2% were due to CVD and diabetes mellitus,  
53 respectively (6).

54 Due to the advancement of HIV care programs, persons living with HIV (PLHIV) now live longer  
55 (7). For this reason, they are at increased risk of developing Non-Communicable Diseases (NCDs)  
56 such as hypertension (HTN) and type 2 diabetes mellitus (T2DM) like other persons due to aging.  
57 In addition to the increased risk due to aging, the HIV disease itself and anti-retroviral treatment  
58 (ART) use add more risk of NCDs to PLHIV (8–10). Chronic immune activation due to the virus  
59 and medication side effects are critical mechanisms that lead to this increased risk (11).  
60 Cardiovascular disease is the leading cause of non-AIDS-related morbidity and mortality among  
61 PLHIV (11). Diabetes affects PLHIV almost twice as often as persons without HIV (12–14).  
62 Patients with multiple comorbidities can benefit by providing integrated care for all the diseases  
63 at a single point of care (15–17). Different studies have shown that an integrated platform of care  
64 is very crucial in addressing NCDs (17–20).

65 The prevalence of HIV in Tanzania in 2018 was estimated to be at 4.6% (21). This translated into  
66 about 1.4 million children and adults living with the infection in the country. There has been a  
67 progressive decline in the number of AIDS-related deaths in the past decade with overall AIDS-

68 related mortality decreasing by 50%, from 48,000 deaths in the year 2010 to 24,000 deaths in the  
69 year 2018 (21).

70

71 HIV care programs have many resources in contrast with NCDs care that is poorly financed and  
72 is not effectively integrated into the HIV care programs (22,23). The country experiences a lack  
73 of evidence-based care model for scaling up integrated HIV/NCDs care (2). This is due to  
74 inadequate or absence of effective monitoring and evaluation systems (poor NCD surveillance)  
75 and inadequate use of health information regarding NCDs (15). The country has weak chronic  
76 disease care health system which is not patient-centered, resulting in ineffective control of chronic  
77 diseases among all and also among PLHIV (15). There are often inadequate multi-sectoral  
78 responses to the diseases, inadequate resources (human, infrastructures, and funds), poor  
79 governance and leadership, and low capacity of health service providers in terms of knowledge,  
80 skills, and numbers (22).

81 Our project, therefore, aimed at describing missed opportunities to diagnose and care for  
82 hypertension (HTN) and diabetes (DM) among PLHIV attending CTC in Dar es Salaam, Tanzania,  
83 and implementing and evaluating hypertension and diabetes mellitus preventive efforts among  
84 these patients.

85

86

87

## 88 **MATERIALS AND METHODS**

### 89 **Project design:**

90 This was a facility-based screening program for hypertension and diabetes among PLHIV  
91 receiving care at CTC in Dar es Salaam, Tanzania. It was conducted from January to June 2020.

92

### 93 **Project setting:**

94 The project was carried out at CTC at Temeke Regional Referral Hospital (Temeke RRH). Temeke  
95 RRH is a public owned hospital that is located in the southern part of Dar es Salaam region, the  
96 largest commercial city located in the Eastern part of Tanzania. Although the hospital has  
97 specialized diabetic, cardiovascular, and CTC clinics, the services are not integrated. Patients who  
98 have been diagnosed with HTN or diabetes in an HIV clinic are referred for care in these separate  
99 clinics within the hospital settings.

100

### 101 **Target population:**

102 The target population was PLHIV aged 18 years or above attending Temeke RRH in Temeke  
103 District in Dar es Salaam, Tanzania. We used convenient sampling to select PLHIV who attended  
104 CTC within the 5 days of data collection. Clients were randomly selected based on availability at  
105 the time of interview. The project excluded pregnant women living with HIV/AIDS and patients  
106 with mental diseases.

107

### 108 **Project variable:**

109 Data collected involved demographic information, blood pressure and biochemical measurements  
110 (Blood glucose level and cholesterol level). The project also involved a short discussion for

111 exploring the factors leading to poor adherence to hypertensive and diabetic medication. The  
112 primary outcome at various time points were missed opportunities for diagnosis and care for NCDs  
113 among PLHIV. Secondary outcomes were control rates of hypertensive and diabetic patients at the  
114 end of a three month intervention.

115

### 116 **Blood pressure and glucose measurements:**

117 Blood pressure and glucose level were measured following the Tanzania national guidelines.  
118 Blood pressure (BP) was measured by trained personnel using a standardized protocol and  
119 validated and regularly calibrated electronic sphygmomanometers (Omron HEM-7270). Blood  
120 sugar levels were measured using rapid methods (Accu-chek®). Fasting and random blood sugar  
121 level was used and diagnosis was based on Tanzania national guideline. Fasting blood glucose was  
122 considered when patient reported not eating for more than 8 hours. Blood pressure was checked  
123 three times, 5 minutes after arrival to the clinic, during triaging at the triage desk (approximately  
124 30 minutes later), and at the consultation desk with a doctor. The mean of the three measurements  
125 of blood pressure were used for diagnosis of hypertension. Hypertension and T2DM were defined  
126 according to the Tanzania national guideline (9). Hypertension was defined as blood pressure (BP)  
127 equal to or above 140/90 mmHg, T2DM was defined as raised fasting blood sugar of 7.0 mmol/L  
128 (126 mg/dl) or more or a random blood sugar equal or above 11.1 mmol/L (200 mg/dL). Blood  
129 pressure control was defined as when the systolic BP was below 140mmHg and diastolic BP below  
130 90 mm Hg on anti hypertension treatment. DM was defined as being controlled when fasting blood  
131 glucose was below 6 mmol/L.

132

133 **Enrolled in a follow-up group:**

134 A cohort of 76 patients with HTN and T2DM/high blood glucose levels during the current project  
135 was followed for three months. At each clinic visit, patients received health education on  
136 hypertension and DM. Individuals with hypertension were managed using a clinical and  
137 medication management algorithm based on the Tanzania clinical guideline (9). Participants  
138 diagnosed with diabetes were encouraged to do a lifestyle change. The patient's registry was  
139 developed following recommendations from the HEARTS technical package of the World Health  
140 Organization (WHO) and Tanzania national guideline with some modification (10,11). A simple  
141 surveillance system was developed for all patients diagnosed with HTN and T2DM. All 76 patients  
142 had complete data and were involved in the analysis at the end of the study.

143 *Figure 1: The diagram showing the PLHIV diagnosed with hypertension, DM or both and*  
144 *enrollment into the cohort group for follow-up.*

145

146 **A focus group discussion:**

147 A focus group discussion was conducted to ascertain participant knowledge about BP control and  
148 reasons for poor blood pressure control. A convenience sample of patients was identified that  
149 included 10 clients and 10 health care workers.

150

151 **Analysis of data:**

152 Data were entered and cleaned using Epi info version 7, and then analyzed using STATA version  
153 15 for Windows (Stata Corp., College Station, TX, USA). Descriptive statistics such as median  
154 (with interquartile range) and frequencies (with percentages) were used to illustrate the baseline  
155 characteristics of participants with the relevant variables. A short description of qualitative

156 information was reported. Missing data were excluded from the analysis. Chi-square test was used  
157 to compare categorical variables between intervention and non-intervention group in relation to  
158 hypertension and diabetes diagnosis outcome. Fisher's exact test was used where appropriate. The  
159 null hypothesis was that, there was no difference in distribution of characteristics between  
160 intervention and non-intervention group. An alternative hypothesis was that, at least one  
161 characteristics was related to intervention and non-intervention group. Binary logistic regression  
162 was used to ascertain association between the independent and dependent variables. All  
163 independent variables with a P value  $\leq 0.1$  in the bivariate analyses were included in the final  
164 multivariable logistic model in order to identify the risk factors for getting hypertension and  
165 diabetes. All variables which attained a p-value  $<0.05$  was considered statistically significant. A  
166 paired t-test was conducted on the measurements of 76 participants (systolic and diastolic pressure,  
167 BMI, and fasting blood glucose levels) to determine if measurements at month three were different  
168 from those taken at baseline to ascertain the effectiveness of the intervention.

169

#### 170 **Ethical consideration:**

171 An ethical clearance to conduct this project was obtained from the Muhimbili University of Health  
172 and Allied Sciences Institutional Research Board. Permission to conduct the study at Temeke  
173 Regional Referral Hospital was obtained from the Medical Officer In-charge. All participants gave  
174 informed consent to participate in the project after a thorough description of the study objectives  
175 and risks associated with participation. The project ensured privacy and confidentiality to all  
176 participants.



## 177 RESULTS:

### 178 3.1. Demographic and Clinical Characteristics of the Study Participants.

#### 179 Study size:

180 A total of 335 PLHIV participated in the interview, with two (2) participants removed from the  
181 analysis due to incomplete information.

182  
183 A total of 333 patients were included in the evaluation for hypertension and blood sugar levels.  
184 Demographic and clinical characteristics were compared between patients diagnosed with diabetes  
185 and hypertension (intervention group) and those not diagnosed with either diseases (control group)  
186 as shown in *table 1*. The median age (IQR) for the study participants was 46 (39-52) years. There  
187 was a significant age difference between intervention and control group (*P-value 0.02*). The  
188 intervention group were a bit older with a median age (IQR) of 48 (42-58) compared to the control  
189 group median (IQR) age of 46 (38-51). Except for age, body mass index and waist hip ratio which  
190 showed a significant difference between intervention and control group, there no significant  
191 difference in all other variables between the two groups (*Table 1*).

192  
193 **Table 1: Demographic and Clinical characteristics of patients diagnosed and not diagnosed**  
194 **with hypertension and diabetes among people living with HIV/AIDS attending Care and**  
195 **Treatment Center in Dar es Salaam, Tanzania in 2020**

| Characteristics           | Overall (N 333) | Intervention group (N 76<br>(22.82%)) | Control group (N 257<br>(77.18%)) | P-value |
|---------------------------|-----------------|---------------------------------------|-----------------------------------|---------|
| Median age (SD)           | 46 (39-52)      | 48 (42-58)                            | 46 (38-51)                        |         |
| Age group in years, n (%) |                 |                                       |                                   |         |
| 18-39                     | 84 (25.23)      | 11 (11.47)                            | 73 (28.40)                        | 0.02    |
| 40-49                     | 141 (42.34)     | 32 (42.11)                            | 109 (42.41)                       |         |

|                              |             |            |             |      |
|------------------------------|-------------|------------|-------------|------|
| 50-75                        | 108 (32.43) | 33 (43.42) | 75 (29.18)  |      |
| Marital status               |             |            |             |      |
| Single                       | 72 (21.62)  | 13 (17.11) | 59 (22.96)  | 0.25 |
| Married/Cohabiting           | 118 (35.44) | 23 (30.26) | 95 (36.96)  |      |
| Divorced/Separated           | 87 (26.13)  | 23 (30.26) | 64 (24.90)  |      |
| Widowed                      | 56 (16.82)  | 17 (22.37) | 39 (15.18)  |      |
| Residence, n (%)             |             |            |             |      |
| Temeke                       | 277 (83.18) | 66 (86.84) | 211 (82.10) | 0.33 |
| Other districts              | 56 (16.82)  | 10 (13.16) | 46 (17.90)  |      |
| Education level, n (%)       |             |            |             |      |
| Not educated                 | 37 (11.11)  | 10 (13.16) | 27 (10.51)  | 0.80 |
| Primary School               | 236 (70.87) | 55 (72.37) | 181 (70.43) |      |
| Secondary School             | 53 (15.92)  | 10 (13.16) | 43 (16.73)  |      |
| College/University           | 7 (2.10)    | 1 (1.32)   | 6 (2.33)    |      |
| Duration since HIV Diagnosis |             |            |             |      |
| ≤ 5 years                    | 73 (21.92)  | 11 (14.47) | 62 (24.12)  | 0.07 |
| >5 years                     | 260 (78.08) | 65 (85.53) | 195 (75.88) |      |
| HIV Stage on diagnosis       |             |            |             |      |
| Stage 1                      | 58 (17.42)  | 16 (21.05) | 42 (16.34)  | 0.29 |
| Stage 2                      | 87 (26.13)  | 15 (19.74) | 72 (28.02)  |      |
| Stage 3                      | 162 (48.65) | 41 (53.95) | 121 (47.08) |      |
| Stage 4                      | 26 (7.81)   | 4 (5.26)   | 22 (8.56)   |      |
| CD4 count on diagnosis       |             |            |             |      |
| 0-200                        | 60 (18.02)  | 12 (15.79) | 48 (18.68)  | 0.16 |
| 201-350                      | 48 (14.41)  | 17 (22.37) | 31 (12.06)  |      |
| 351-2000                     | 81 (24.32)  | 16 (21.05) | 65 (25.29)  |      |
| Not documented               | 144 (43.24) | 31 (40.79) | 113 (43.97) |      |
| Duration on ART, n (%)       |             |            |             |      |
| 0-1 year                     | 42 (12.61)  | 7 (9.21)   | 35 (13.62)  | 0.66 |
| 2-4 years                    | 89 (26.73)  | 21 (27.63) | 68 (26.46)  |      |
| > 5 years                    | 202 (60.66) | 48 (63.16) | 154 (59.92) |      |
| Current ART used, n (%)      |             |            |             |      |

|                                             |              |              |             |       |
|---------------------------------------------|--------------|--------------|-------------|-------|
| First-line                                  | 297 (89.19)  | 67 (88.16)   | 230 (89.49) | 0.85  |
| Second line                                 | 12 (3.60)    | 3 (3.95)     | 9 (3.50)    |       |
| Not documented                              | 24 (7.21)    | 6 (7.89)     | 18 (7.00)   |       |
| Viral load, n (%)                           |              |              |             |       |
| Suppressed                                  | 289 (86.79)  | 66 (86.84)   | 223 (86.77) | 0.91  |
| High viral load                             | 12 (3.60)    | 2 (2.63)     | 10 (3.89)   |       |
| Not documented                              | 32 (9.61)    | 8 (10.53)    | 24 (9.34)   |       |
| Tobacco use, n (%)                          |              |              |             |       |
| Current tobacco user                        | 17 (5.11)    | 1 (1.32)     | 16(6.23)    | 0.09  |
| Not using tobacco                           | 316 (94.89)  | 75 (98.68)   | 241 (93.77) |       |
| Alcohol use, n (%)                          |              |              |             |       |
| Current alcohol users                       | 26 (7.81)    | 6 (7.89)     | 20 (7.78)   | 0.97  |
| Not using alcohol currently                 | 307 (92.19)  | 70 (92.11)   | 237 (92.22) |       |
| Mean Body mass index (kg/m <sup>2</sup> )   |              |              |             |       |
| (SD)                                        | 25.95 (5.70) | 28.15 (5.71) | 25.30(5.55) |       |
| Body mass index (kg/m <sup>2</sup> ), n (%) |              |              |             |       |
| Underweight                                 | 10 (3.00)    | 0 (0.00)     | 10 (3.89)   | <0.01 |
| Normal                                      | 160 (48.05)  | 27 (35.53)   | 133 (51.75) |       |
| Overweight                                  | 92 (27.63)   | 23 (30.26)   | 69 (26.85)  |       |
| Obese                                       | 71 (21.32)   | 26 (34.21)   | 45 (17.51)  |       |
| Waist Hip Ratio                             |              |              |             |       |
| Recommended ratio                           | 110 (33.03)  | 18 (23.68)   | 92 (35.80)  | 0.05  |
| Abdominal obesity 1                         | 86 (25.83)   | 27 (35.53)   | 59 (22.96)  |       |
| Abdominal obesity                           | 137 (41.14)  | 31 (40.79)   | 106 (41.25) |       |
| Physical activities, n (%)                  |              |              |             |       |
| Met WHO Standard                            | 86 (25.83)   | 29 (32.22)   | 57 (23.46)  | 0.11  |
| Did not meet the WHO standard               | 247 (74.17)  | 61 (67.78)   | 186 (76.54) |       |

196 Overweight=BMI between 25.0 -29.9, Obese=BMI  $\geq$ 30.0, HTN=BP $\geq$ 140/90, Isolated Systolic HTN =Systolic  
 197 BP>140, diastolic BP< 90, Isolated Diastolic HTN-Diastolic BP>90, systolic BP <140, Suppressed viral load=Viral  
 198 load<1000 copies/MLS, High viral load=Viral load $\geq$ 1000 copies/MLS, Physical activities-WHO recommendation-

199 An equivalent combination of moderate- and vigorous-intensity physical activity achieving at least 600 MET-  
200 minutes, Diabetes-Fasting plasma glucose level  $\geq 7.0$  mmol/L

201

202 Overall, of 333 participants, 71/333 (21.32%) participants had hypertension and 9/333 (2.70%)  
203 were diabetic. Four 4/333 (1.20%) participants were diagnosed with both hypertension and  
204 diabetes. Of the 71 patients with hypertension, only 34/71 (47.89%) knew they had hypertension  
205 and only 5 (7%) were already on treatment but had not achieved blood pressure control. Over  
206 half of the study participants 177/333 (53.15%) have reported never having their blood pressure  
207 measured before, and among these 37/177 (20.90%) were newly diagnosed with hypertension.  
208 Overall, of the 9 participants with diabetics, 4/9 (44.44%) knew they had diabetes and were on  
209 treatment and 5/9 (66.67%) were diagnosed during the study.

210

211 The prevalence of hypertension was significantly higher in patients older than 40 years (32/71  
212 (42.11) and 50 years (33/71, 43.42%) compared to the younger counterparts aged less than 39  
213 years (11/71, 11.47%;  $P < 0.05$ ).

214

### 215 **Univariate and Multivariate analysis:**

216 Univariate and multivariate analyses results are shown in Table 2. All variable with crude OR of  
217 equal or more than 0.1 in the univariate analysis were subjected to multivariate analysis. In the  
218 analysis of risk factors, obese patients were 4 times as likely to have hypertension (AOR = 3.67;  
219 95%CI: 1.64 – 8.17) compared to patients with normal body weight. This finding was significant  
220 even after controlling for other confounder including age, gender. People above 40 and 50 years  
221 were twice at risk each of getting hypertension compared to people aged below 40 years (AOR  
222 1.76 95%CI 0.71-3.35 and AOR 2.48 95%CI 0.96-6.42 respectively). People with diabetes

223 mellitus were 5 times at significant risk of getting hypertension although the sample size was not  
 224 adequate for comparison (AOR 5.30 95%CI 1.04-26.98).

225

226 **Table 2: Association between risk factors and elevated blood pressure or blood glucose**  
 227 **among people living with HIV/AIDS attending Care and Treatment Center in Dar es**  
 228 **Salaam, Tanzania in 2020**

| Characteristics           | Crude OR | P-value | 95% CI    | Adjusted OR | P-value | 95% CI    |
|---------------------------|----------|---------|-----------|-------------|---------|-----------|
| <b>Sex</b>                |          |         |           |             |         |           |
| Male                      | 1        |         |           | 1           |         |           |
| Female                    | 1.50     | 0.21    | 0.80-2.81 | 1.05        | 0.89    | 0.48-2.27 |
| <b>Age group in years</b> |          |         |           |             |         |           |
| 18-39                     | 1        |         |           | 1           |         |           |
| 40-49                     | 1.79     | 0.13    | 0.85-3.80 | 1.76        | 0.22    | 0.71-4.34 |
| 50-75                     | 2.59     | 0.02    | 1.19-5.46 | 2.48        | 0.06    | 0.96-6.42 |
| <b>Residence,</b>         |          |         |           |             |         |           |
| Other districts           | 1        |         |           |             |         |           |
| Temeke                    | 1.30     | 0.69    | 0.62-2.72 |             |         |           |
| <b>Marital status</b>     |          |         |           |             |         |           |
| Single                    | 1        |         |           |             |         |           |
| Married/Cohabiting        | 0.98     | 0.96    | 0.46-2.12 |             |         |           |
| Divorced/Separated        | 1.44     | 0.35    | 0.66-3.14 |             |         |           |
| Widow/Widower             | 1.82     | 0.16    | 0.79-4.18 |             |         |           |
| <b>Education level</b>    |          |         |           |             |         |           |
| Primary School            | 1        |         |           |             |         |           |
| Not educated              | 0.98     | 0.96    | 0.43-2.26 |             |         |           |
| Secondary School          | 0.82     | 0.61    | 0.61-1.75 |             |         |           |

|                                      |         |       |            |         |       |            |
|--------------------------------------|---------|-------|------------|---------|-------|------------|
| College/University                   | 0.59    | 0.63  | 0.07-5.01  |         |       |            |
| HIV Stage on diagnosis               |         |       |            |         |       |            |
| Stage 1                              | 1       |       |            | 1       |       |            |
| Stage 2                              | 0.50    | 0.10  | 0.22-1.13  | 0.41    | 0.08  | 0.16-1.11  |
| Stage 3                              | 0.86    | 0.66  | 0.44-1.60  | 0.69    | 0.39  | 0.30-1.61  |
| Stage 4                              | 0.15    | 0.04  | 0.01-0.84  | 0.07    | 0.03  | 0.01-0.72  |
| Duration on ART                      |         |       |            |         |       |            |
| ≤ 5 years                            | 1       |       |            |         |       |            |
| > 5 years                            | 1.09    | 0.75  | 0.64-1.86  |         |       |            |
| Viral load                           |         |       |            |         |       |            |
| Suppressed                           | 1       |       |            |         |       |            |
| High viral load                      | 0.73    | 0.69  | 0.16-3.43  |         |       |            |
| Tobacco use                          |         |       |            |         |       |            |
| Not using tobacco                    | 1       |       |            |         |       |            |
| Current tobacco user                 | 0.22    | 0.15  | 0.03-1.69  |         |       |            |
| Alcohol use                          |         |       |            |         |       |            |
| Not using alcohol                    | 1       |       |            |         |       |            |
| Current alcohol users                | 1.12    | 0.82  | 0.43-3.05  |         |       |            |
| Body mass index (kg/m <sup>2</sup> ) |         |       |            |         |       |            |
| Underweight                          | Omitted |       |            | Omitted |       |            |
| Normal                               | 1       |       |            | 1       |       |            |
| Overweight                           | 1.59    | 0.16  | 0.83-3.05  | 1.73    | 0.19  | 0.76-3.92  |
| Obese                                | 2.93    | <0.01 | 1.54-5.61  | 3.67    | <0.01 | 1.64-8.17  |
| Physical activities (WHO)            |         |       |            |         |       |            |
| Met Standard                         | 1       |       |            |         |       |            |
| Did not meet the standard            | 1.25    | 0.48  | 0.67-2.33  |         |       |            |
| Diabetes mellitus                    |         |       |            |         |       |            |
| Normal blood sugar                   | 1       |       |            | 1       |       |            |
| Diabetic                             | 3.28    | 0.09  | 0.85-12.68 | 5.30    | 0.05  | 1.04-26.98 |

229 Overweight=BMI between 25.0 -29.9, Obese=BMI  $\geq$ 30.0, HTN=BP $\geq$ 140/90, Isolated Systolic HTN =Systolic  
 230 BP>140, diastolic BP< 90, Isolated Diastolic HTN-Diastolic BP>90, systolic BP <140, Suppressed viral load=Viral  
 231 load<1000 copies/MLS, High viral load=Viral load $\geq$ 1000 copies/MLS, Physical activities-WHO recommendation-  
 232 An equivalent combination of moderate- and vigorous-intensity physical activity achieving at least 600 MET-  
 233 minutes, Diabetes-Fasting plasma glucose level  $\geq$  7.0 mmol/L

234  
 235 All patients included in the cohort (76) had completed data and were available for analysis at the  
 236 end of the 3 month study.

237  
 238 After three months of intervention, the mean change in blood pressure for study participants was  
 239 from 164 to 159 mm/Hg for systolic blood pressure and 100 to 96 mm/Hg for diastolic blood  
 240 pressure. Blood sugar level of patients who were diagnosed to be diabetic changed from the mean  
 241 value of 11.96 to 9.38 mmol/L. Also for BMI, the change was from 28.9 to 27.5 kg/m<sup>2</sup>. (**Table 3**)

242  
 243 **Table 3: The effects of three months of preventive efforts in 76 HIV positive patients with**  
 244 **elevated blood pressure or blood glucose attending Care and Treatment Center in Dar es**  
 245 **Salaam, Tanzania in 2020**

| Physical and biochemical measurements | Baseline measurements (mean $\pm$ SD) | Measurements at three months (mean $\pm$ SD) | P-value |
|---------------------------------------|---------------------------------------|----------------------------------------------|---------|
| Diastolic pressure (mm/Hg)            | 99.52 $\pm$ 14.23)                    | 95.76 (12.51)                                | < 0.01  |
| Systolic pressure (mm/Hg)             | 164.28 $\pm$ 21.62                    | 158 $\pm$ 21.23                              | 0.01    |
| Fasting blood level (mmol/L)          | 5.47 $\pm$ 2.85                       | 5.41 $\pm$ 2.57                              | 0.82    |
| BMI (Kg/m <sup>2</sup> )              | 28.89 $\pm$ 8.39                      | 27.46 $\pm$ 5.60                             | 0.08    |

246

247 Results for a paired t-test showed a significant decrease in mean systolic blood pressure ( $t = 3.07$   
 248  $w/df=81, p < 0.01, 95\%CI (2.01, 9.45)$ ) and mean diastolic blood pressure ( $t=2.91 w/df=81, p < 0.01,$   
 249  $95\%CI (1.19, 6.33)$ ). There was no statistically significant difference in mean FBG level ( $t=0.03$   
 250  $w/df=81, p = 0.82, 95\%CI (-0.45, 0.57)$ ) and BMI ( $t=1.76 w/df=81, p = 0.08, 95\%CI (-0.18, 3.03)$ ).  
 251  
 252 Univariate and multivariate analysis were conducted to show the relationship of factors at the start  
 253 of intervention with the decrease in blood pressure and blood glucose level. The factors to include  
 254 in the univariate and multivariate analysis were selected based on being significant risk factors for  
 255 hypertensive or diabetic. There were no factors related to decrease in blood pressure and glucose  
 256 blood level at the univariate analysis, although at multivariate analysis, age above 50 years and  
 257 being obese at the start of intervention were related to decrease in blood pressure level *Table 4*.

258  
 259 **Table 4: Association between risk factors and decreased blood pressure or blood glucose**  
 260 **among 76 people living with HIV/AIDS after three months of intervention in a Care and**  
 261 **Treatment Center in Dar es Salaam, Tanzania in 2020**

| Characteristics           | Crude OR | P-value | 95% CI     | Adjusted OR | P-value | 95% CI    |
|---------------------------|----------|---------|------------|-------------|---------|-----------|
| <b>Sex</b>                |          |         |            |             |         |           |
| Male                      | 1        |         |            | 1           |         |           |
| Female                    | 1.50     | 0.21    | 0.80-2.81  | 1.22        | 0.55    | 0.63-2.37 |
| <b>Age group in years</b> |          |         |            |             |         |           |
| 18-39                     | 1        |         |            | 1           |         |           |
| 40-49                     | 1.57     | 0.64    | 0.24-10.49 | 1.78        | 0.14    | 0.83-3.82 |
| 50-75                     | 0.96     | 0.97    | 0.16-5.93  | 2.27        | 0.04    | 1.04-4.96 |
| <b>Residence,</b>         |          |         |            |             |         |           |
| Other districts           | 1        |         |            |             |         |           |



|                           |         |      |           |      |      |           |
|---------------------------|---------|------|-----------|------|------|-----------|
| Temeke                    | 0.54    | 1.75 | 0.84—18.0 |      |      |           |
| Marital status            |         |      |           |      |      |           |
| Underweight               | 1       |      |           | 1    |      |           |
| Normal                    | 0.66    | 0.49 | 0.20-2.15 | 1    |      |           |
| Overweight                | 0.75    | 0.65 | 0.22-2.60 | 1.49 | 0.24 | 0.77-2.88 |
| Obese                     | Omitted |      |           | 2.56 | 0.01 | 1.30-5.05 |
| Marital status            |         |      |           |      |      |           |
| Single                    | 1       |      |           |      |      |           |
| Married/Cohabiting        | 0.98    | 0.96 | 0.46-2.12 |      |      |           |
| Divorced/Separated        | 1.44    | 0.35 | 0.66-3.14 |      |      |           |
| Widow/Widower             | 1.82    | 0.16 | 0.79-4.18 |      |      |           |
| Physical activities (WHO) |         |      |           |      |      |           |
| Met Standard              | 1       |      |           |      |      |           |
| Did not meet the standard | 0.29    | 0.13 | 0.06-1.42 | 1.23 | 0.53 | 0.65-2.32 |

262

263

264 **Adherence to diabetic and hypertensive medication:**

265 Three focused group discussions were conducted, 10 participants and 10 healthcare workers were  
 266 interviewed to explore the understanding of the participants on various risk factors for  
 267 hypertension and diabetes. Also, barriers to care and adherence were discussed. Pre-defined  
 268 questions were created to guide the discussion. After enough information was collected the  
 269 discussion was stopped. Responses were documented during the focus group by one of the project  
 270 implementers in a paper for reference during report writing.

271

272 Almost all participants had good knowledge of hypertension and diabetes. From the discussion,  
 273 the most reported challenges to adherence to medication were lack of money to buy medication,

274 unaffordable consultation fees, and medication side effects. Most of the participants didn't know  
275 the type of medication regimen they are taking, while others never took medication after diagnosis  
276 or even after hypertensive and diabetic disease medication have been prescribed. Few reported  
277 taking medication when they develop some hypertensive or diabetic symptoms as most other f  
278 time were asymptomatic. The main reason was the high cost of medication or feeling well even  
279 after diagnosis. Additionally, other participants were diagnosed and kept on treatment for either  
280 HTN or DM other than the current clinic but never reported that they were on treatment. Health  
281 care workers reported the absence of a specialized NCDs clinic at the Care and Treatment Center  
282 (CTC). They also have no current knowledge of the management of hypertension and diabetes to  
283 PLHIV. They have reported having no access to routine physical and biochemical checkup at the  
284 clinic hence rendering them to miss patients suffering from NCDs.

285

286

## 287 **DISCUSSION**

288 In this project, we found that integration of hypertension (HTN) and diabetes (DM) prevention  
289 efforts among PLHIV attending care is suboptimal in a care and treatment clinic. Most PLHIV  
290 reported to never measured their blood pressure and some had a silent disease that was not  
291 diagnosed at the clinic due to the absence of routine screening of NCDs among PLHIV. The risk  
292 of having hypertension among PLHIV was high in obese patients and diabetic patients. The project  
293 also revealed that PLHIV with other NCDs co-morbidities do not adhere to NCDs medication due  
294 to high medication costs and having a silent disease. Health care workers providing HIV care do  
295 not have up-to-date knowledge on hypertension and diabetic care rendering it difficult providing  
296 of NCDs care among PLHIV. Close follow-up on hypertension and diabetes among PLHIV was  
297 found to be productive due to a significant decrease in mean systolic and diastolic blood pressures  
298 at the end of the follow-up period.

299

300 In our study, many HIV-positive were not screened for hypertension and diabetes in the facility  
301 revealing missed opportunities to diagnose other co-morbidities among PLHIV. Due to the absence  
302 of routine screening and care of hypertension and diabetes at the clinic, patients although known  
303 to have hypertension did not report on their conditions to health facilities. This is similar to the  
304 results found in Malawi and other parts of Africa where there was low integration of NCDs care  
305 in PLHIV (15,19,24). This result contradicts results obtained in another study in Tanzania which  
306 reveals the integration of care to be practiced in some health facilities with high acceptability of  
307 the model (25). The main reason for these findings is probably due to HIV care settings that do not  
308 mandate the clinician to provide NCDs care among PLHIV. As this has not been the practice,  
309 health care providers in CTC did not have up-to-date information regarding the provision of NCDs

310 care among PLHIV similar to the findings from a study done in South Africa (26). Findings from  
311 our study call for the country to ensure health care professionals providing HIV care to be well  
312 trained on providing comprehensive care that also includes NCDs care apart from focusing on only  
313 HIV services.

314  
315 Hypertension is a major risk factor for heart diseases however this is not well known among  
316 PLHIV (15,27–29). Our project found the prevalence of HTN to be 21.32%. This prevalence is  
317 lower compared to the estimated prevalence of 26% in the general population in Tanzania (30).  
318 Similar findings were obtained in a study conducted in Senegal (31). The prevalence of  
319 hypertension observed in this study is higher compared to a study which was conducted in rural  
320 Tanzania which found the prevalence of hypertension to be 11.6% (9,32). However, it was lower  
321 than that reported by studies conducted elsewhere in Mbeya and Ethiopia (32,33). The results in  
322 this project could be explained due to the nature of the project which relied on convenience  
323 sampling.

324  
325 Obesity was found to be an important risk factor for the development of hypertension in the current  
326 study. This finding were obtained in this study suggesting that obesity may lead to the development  
327 of hypertension. Similar findings were found in other studies conducted in Tanzania and other  
328 countries in Africa (31–33). These finding could be explained by the growing evidence that  
329 increased visceral fat in the body is a pathological depot that leadeth to accumulation of more  
330 visceral fat in tissues (34,35). Visceral fat have been linked to increased inflammatory reactions in  
331 endothelial cells of the blood vessels due to its sensitivity to lipolysis leading to endothelial  
332 dysfunction and arterial hypertension (34,35). More evidence from different studies shows that

333 increased prevalence of overweight and obesity has caused increased burden of hypertension  
334 (36,37). These findings add to the evidence that as BMI is easily measured and widely accessible  
335 it remains to be a simple and effective tool for screening hypertension in public practice.

336  
337 In our study, diabetes was also associated with hypertension. Similar findings were found in a  
338 study that was conducted in Northeast Ethiopia (33). These findings further add to the evidence  
339 that diabetes is a risk factor for hypertension and adds up to the burden of HIV and the need for  
340 screening diabetes for all hypertensive HIV-positive patients (38,39).

341  
342 Furthermore, our project found a significant change in blood pressure after three months of  
343 intervention both for systolic and diastolic blood pressure showing the effectiveness of the  
344 intervention. These findings were similar to findings in a study conducted in Bangladesh although  
345 only physical and behavioral measurements were considered and not biochemical and blood  
346 pressure levels (16). Our project showed no significant change in BMI value, while a study in  
347 Bangladesh showed a significant change in the level of physical activity which might result in a  
348 change in BMI value (16).

349  
350 This project was conducted in an HIV setting where normal clinic visits took place so did not result  
351 in disruption of care to PLHIV. Although risk factors were identified and added to the evidence,  
352 information cannot be generalized elsewhere in Tanzania but can be used as a model to better  
353 research studies and program implementation. Participants were not randomly selected so some  
354 findings are prone to bias, this was because the study focused on control program, or prevention  
355 program and provide concise documentation to that effect. The other important limitation is that

356 the project was implemented during the COVID-19 pandemic which affected every part of the  
357 world. In our study, it has affected the scheduled patient follow-up clinic and measurements as  
358 PLHIV were among the group prone to infection hence they were given long clinic visits to avoid  
359 congestion at the clinic. Few HCWs were also scheduled in shifts to attend a clinic due to lack of  
360 protective gear, hence further hindering consultative services to hypertensive patients. To  
361 overcome this we used phone calls to follow-up patients and extension of time for clinic followup  
362 to guarantee that all 76 clients in the cohort managed to have second test for both blood pressure  
363 and blood glucose.

364

## 365 **CONCLUSION AND RECOMMENDATION**

366 Our project found that most HIV-positive patients are not screened for hypertension or other  
367 NCDs. On top of that, we found that health education and close follow-up using surveillance  
368 database is of importance for monitoring of patients. We found also that, adherence to antidiabetic  
369 and antihypertensive medication is inadequate due to the high cost of medication and lack of  
370 follow-up and monitoring. Also, the project found that being obese and diabetic are the risk factors  
371 for hypertension. Working in the government or private organization and stage four HIV disease  
372 were associated with lower risk for hypertension. Overall, our project has shown that integration  
373 of NCDs care in HIV clinics is possible and health education-based intervention at health facilities  
374 can result in positive change if practiced effectively. This method can be recommended as a  
375 promising strategy in reducing the NCD burden among PLHIV.

376

377 We recommend the integration of NCDs and HIV services in Tanzania. Also we recommend the  
378 need to strengthen health education and screening of NCDs as the prevalence continues to grow

379 among PLHIV and significant changes are observed with the creation of awareness. The cost of  
380 antihypertensive and antidiabetic medication needs to be affordable, especially to PLHIV. We  
381 recommend also more robust methodological studies on the integration of NCDs care among  
382 PLHIV to make evidence-based information using a big sample size with all inclusive and  
383 exclusive criteria into consideration.

384 **ACKNOWLEDGEMENT**

385 The authors wish to thank the The Centers for Disease Control and Prevention (CDC) for financial  
386 support.

387

388 **AUTHOR CONTRIBUTION:**

389 Conceptualization: AM, GM, EM.

390 Data curation: AM, GM.

391 Formal analysis: AM, GM, EM.

392 Funding acquisition: AM.

393 Investigation: AM.

394 Methodology:AM, GM, EM.

395 Project administration: AM.

396 Software: AM.

397 Supervision: MM, RK, AT, LB, MS.

398 Validation:MS . Visualization: AM.

399 Writing – original draft: AM. Writing – review& editing: AD,MM,AT

400

401

402

403

404

405

406



407 **REFERENCES**

408

- 409 1. Chigom E. DEVELOPMENT OF AN IMPLEMENTATION ROADMAP 2023–2030  
410 FOR THE GLOBAL ACTION PLAN FOR THE PREVENTION AND CONTROL OF  
411 NCDS 2013–203. World Health. 2020.
- 412 2. United Republic of Tanzania. Strategic and action plan for the prevention and control of  
413 Non Communicable Diseases in Tanzania 2016-2020. 2020.
- 414 3. Redaktion D. Non-communicable diseases: Editorial. Vol. 24, Public Health Forum. 2016.  
415 69 p.
- 416 4. World Health Organization (WHO). GLOBAL ACTION PLAN FOR THE  
417 PREVENTION AND CONTROL OF NONCOMMUNICABLE DISEASES. 2013.
- 418 5. Of R, Death P, To DUE. UNITED REPUBLIC OF TANZANIA. 2018;2018.
- 419 6. Andrade J. United Republic of Tanzania. World Police & Paramilitary Forces. 2016;199–  
420 199.
- 421 7. TACAIDS. The United Republic of Tanzania Tanzania Commission for Aids National  
422 HIV and AIDS Response Report for 2017. 2017;(June). Available from:  
423 [http://library.tacaids.go.tz/bitstream/handle/123456789/134/National HIV and AIDS](http://library.tacaids.go.tz/bitstream/handle/123456789/134/National%20HIV%20and%20AIDS%20Response%20Report%20for%202017%20-%20Tanzania%20Mainland.pdf?sequence=1&isAllowed=y)  
424 [Response Report for 2017 - Tanzania Mainland.pdf?sequence=1&isAllowed=y](http://library.tacaids.go.tz/bitstream/handle/123456789/134/National HIV and AIDS Response Report for 2017 - Tanzania Mainland.pdf?sequence=1&isAllowed=y)
- 425 8. Mathebula RL, Maimela E, Ntuli NS. The prevalence of selected non-communicable  
426 disease risk factors among HIV patients on anti-retroviral therapy in Bushbuckridge sub-  
427 district, Mpumalanga province. BMC Public Health. 2020;20(1):1–10.
- 428 9. Furrer H, Hatz C, Tanner M, Battegay M, Letang E, Study K. Incidence and risk factors  
429 for hypertension among HIV patients in rural Tanzania – A prospective cohort study.

- 430 2017;630(Ci):1–14.
- 431 10. Divala OH, Amberbir A, Ismail Z, Beyene T, Garone D, Pfaff C, et al. The burden of  
432 hypertension, diabetes mellitus, and cardiovascular risk factors among adult Malawians in  
433 HIV care: consequences for integrated services. *BMC Public Health*. 2016;16(1):1–11.
- 434 11. IAPAC. IAPAC Protocols for the Integrated Management of HIV and Noncommunicable  
435 Diseases [Internet]. International association of providers of AIDS care. 2018. Available  
436 from: [https://www.iapac.org/files/2018/07/IAPAC-Protocols-for-the-Integrated-](https://www.iapac.org/files/2018/07/IAPAC-Protocols-for-the-Integrated-Management-of-HIV-and-Noncommunicable-Diseases_3.pdf)  
437 [Management-of-HIV-and-Noncommunicable-Diseases\\_3.pdf](https://www.iapac.org/files/2018/07/IAPAC-Protocols-for-the-Integrated-Management-of-HIV-and-Noncommunicable-Diseases_3.pdf)
- 438 12. Rasmussen LD, Mathiesen ER, Kronborg G, Pedersen C, Gerstoft J, Obel N. Risk of  
439 Diabetes Mellitus in Persons with and without HIV: A Danish Nationwide Population-  
440 Based Cohort Study. *PLoS One*. 2012;7(9):18–22.
- 441 13. Duncan AD, Goff LM, Peters BS. Type 2 diabetes prevalence and its risk factors in HIV:  
442 A cross-sectional study. *PLoS One*. 2018;13(3):1–11.
- 443 14. Whiting DR, Guariguata L, Weil C, Shaw J. IDF Diabetes Atlas : Global estimates of the  
444 prevalence of diabetes for 2011 and 2030. *Diabetes Res Clin Pract* [Internet].  
445 2011;94(3):311–21. Available from: <http://dx.doi.org/10.1016/j.diabres.2011.10.029>
- 446 15. Pfaff C, Scott V, Hoffman R, Mwangomba B. You can treat my HIV - But can you treat my  
447 blood pressure? Availability of integrated HIV and noncommunicable disease care in  
448 northern Malawi. *African J Prim Heal Care Fam Med*. 2017;9(1):1–8.
- 449 16. Mondal R, Sarker RC, Acharya NP, Banik PC. Effectiveness of health education-based  
450 conventional intervention method to reduce noncommunicable diseases risk factors among  
451 rural population. *Cardiovasc Diagn Ther*. 2019;9(1):30–4.
- 452 17. IAPAC Protocols for the Integrated Management of HIV and Noncommunicable

- 453 Diseases. 2018;(July).
- 454 18. WHO. Integrated care models: an overview [Internet]. Health Services Delivery  
455 Programme. 2016. Available from: [http://www.euro.who.int/en/health-topics/Health-](http://www.euro.who.int/en/health-topics/Health-systems/health-services-delivery/publications/2016/integrated-care-models-an-overview-2016)  
456 [systems/health-services-delivery/publications/2016/integrated-care-models-an-overview-](http://www.euro.who.int/en/health-topics/Health-systems/health-services-delivery/publications/2016/integrated-care-models-an-overview-2016)  
457 2016
- 458 19. Nigatu T. Integration of HIV and noncommunicable diseases in health care delivery in  
459 low- and middle-income countries. *Prev Chronic Dis*. 2012;9(5):9–11.
- 460 20. World Health Organization (WHO). WHO Integrating noncommunicable disease services  
461 into primary health care, Botswana. p. 73–168.
- 462 21. Joint United Nations Programme on HIV/AIDS (UNAIDS). HIV DATA -2019. 2019.
- 463 22. MoHCDGEC (Tanzania Ministry of Health, Community Development, Gender E and,  
464 Children). Strategic and Action Plan for the Prevention and Control of Non  
465 Communicable Diseases in Tanzania 2016 – 2020. Dar es Salaam; 2016.
- 466 23. Patel P, Rose CE, Collins PY, Nuche-berenguer B, Sahasrabudde V V, Peprah E, et al.  
467 Noncommunicable diseases among HIV-infected persons in low-income and middle-  
468 income countries: a systematic review and meta-analysis. 2019;32(Suppl 1):1–28.
- 469 24. Torpey K, Mastro TD. Discussion paper on how to promote the inclusion of the  
470 prevention and control of noncommunicable diseases within other programmatic areas.  
471 2016.
- 472 25. Shayo EH, Seeley J, Bukenya D, Karoli P, Jaffar S. The Acceptability of Integrated  
473 Healthcare Services for HIV and Non-Communicable Diseases: Experiences from Patients  
474 and Healthcare Workers in Tanzania. *Res Sq* [Internet]. 2021;1–22. Available from:  
475 <https://www.researchsquare.com/article/rs-796756/latest.pdf>

- 476 26. Godongwana M, Wet-billings N De, Milovanovic M. The comorbidity of HIV ,  
477 hypertension and diabetes : a qualitative study exploring the challenges faced by  
478 healthcare providers and patients in selected urban and rural health facilities where the  
479 ICDM model is implemented in South Africa. 2021;3:1–15.
- 480 27. Global status report on noncommunicable diseases. 2010;
- 481 28. Mse YX, Chen X, Mse KW. Global prevalence of hypertension among people living with  
482 HIV : A Global prevalence of hypertension among people living with HIV : a systematic  
483 review and. J Am Soc Hypertens [Internet]. 2017;(June). Available from:  
484 <http://dx.doi.org/10.1016/j.jash.2017.06.004>
- 485 29. Mayige M, Kagaruki G, Ramaiya K, Swai A. Non communicable diseases in Tanzania : a  
486 call for urgent action. 2012;14(2):1–12.
- 487 30. WHO. Mongolian STEPS survey on the prevalence of noncommunicable disease and  
488 injury risk factors 2009 [Internet]. WHO Library. 2010. Available from: [internal-  
489 pdf://202.115.27.218/Mongolia\\_2013\\_STEPS\\_Report.pdf](internal-pdf://202.115.27.218/Mongolia_2013_STEPS_Report.pdf)[https://www.who.int/ncds/  
490 surveillance/steps/Mongolia\\_2013\\_STEPS\\_Report.pdf](https://www.who.int/ncds/surveillance/steps/Mongolia_2013_STEPS_Report.pdf)
- 491 31. Africa W, Id NAB, Seydi M, Doye IN, Toure M, Sy P, et al. Increasing prevalence of  
492 hypertension among HIV-positive and negative adults in Senegal ., 2018;1–14.
- 493 32. Kagaruki GB, Mayige MT, Ngadaya ES, Kimaro GD, Kalinga AK, Kilale AM, et al.  
494 Magnitude and risk factors of non-communicable diseases among people living with HIV  
495 in Tanzania: A cross sectional study from Mbeya and Dar es Salaam regions. BMC Public  
496 Health. 2014;14(1):1–9.
- 497 33. Fiseha T, Belete AG, Dereje H, Dires A. Hypertension in HIV-Infected Patients Receiving  
498 Antiretroviral Therapy in Northeast Ethiopia. 2019;2019.

- 499 34. Khan M, Joseph F. Adipose Tissue and Adipokines: The Association with and Application  
500 of Adipokines in Obesity. *Scientifica (Cairo)*. 2014;2014:1–7.
- 501 35. Fain JN, Madan AK, Hiler ML, Cheema P, Bahouth SW. Comparison of the release of  
502 adipokines by adipose tissue, adipose tissue matrix, and adipocytes from visceral and  
503 subcutaneous abdominal adipose tissues of obese humans. *Endocrinology*.  
504 2004;145(5):2273–82.
- 505 36. Landi F, Calvani R, Picca A, Tosato M, Martone AM, Ortolani E, et al. Body mass index  
506 is strongly associated with hypertension: Results from the longevity check-up 7+ study.  
507 *Nutrients*. 2018;10(12):1–12.
- 508 37. Chen Y, Liang X, Zheng S, Wang Y, Lu W. Association of body fat mass and fat  
509 distribution with the incidence of hypertension in a population-based Chinese cohort: A  
510 22-year follow-up. *J Am Heart Assoc*. 2018;7(6):1–9.
- 511 38. Spollett GR. Hyperglycemia in HIV / AIDS. :163–6.
- 512 39. Mayige M, Kagaruki G, Ramaiya K, Swai A. Non communicable diseases in Tanzania: A  
513 call for urgent action. *Tanzan J Health Res*. 2011;13(5 SUPPL.ISS):1–11.
- 514
